# Supplementary material for: Trends in Overall Survival among Patients Treated for Sarcoma at a Large Tertiary Cancer Center between 1986 and 2014
Source: MDPI journal article supplement (doi:10.3390/cancers15020514), 2023-01-14
Supplement: s1 [file s1]

**Supplemental table 2.**

**Histological subtypes of individuals diagnosed with sarcoma at MCC, 1986-2014.**

|                                      | <b>N</b>    | <b>HR (95% CI)</b>  | <b>p-value</b> |
|--------------------------------------|-------------|---------------------|----------------|
| <b>Bone sarcoma subgroups</b>        |             |                     | 5.00E-04†      |
| Osteosarcoma                         | 209 (8.1%)  | 1.00 (referent)     |                |
| Chondrosarcoma                       | 190 (7.4%)  | 0.59*** (0.44-0.80) |                |
| Ewing sarcoma                        | 128 (5%)    | 1.19 (0.89-1.59)    |                |
| <b>Soft tissue sarcoma subgroups</b> |             |                     |                |
| Leiomyosarcoma                       | 519 (20.2%) | 1.22 (0.99-1.51)    |                |
| Liposarcoma                          | 467 (18.2%) | 0.72** (0.57-0.91)  |                |
| Spindle cell sarcoma/NOS             | 375 (14.6%) | 1.47** (1.17-1.86)  |                |
| Gastrointestinal stromal tumor       | 307 (11.9%) | 0.70** (0.54-0.90)  |                |
| Synovial sarcoma                     | 135 (5.3%)  | 0.82 (0.61-1.11)    |                |
| Rhabdomyosarcoma                     | 50 (1.9%)   | 1.25 (0.83-1.89)    |                |
| Endometrial stromal sarcoma          | 63 (2.5%)   | 0.63* (0.42-0.93)   |                |
| Other                                | 127 (4.9%)  | 1.23 (0.92-1.65)    |                |

Abbreviations: HR = hazard ratio; CI = confidence interval

†: Fisher's exact t-test used

\*  $p \leq 0.05$ , \*\*  $p \leq 0.01$  \*\*\*  $p \leq 0.001$ , \*\*\*\*  $p \leq 0.0001$

Supplemental Table 3.

Histological subtypes on changes in overall survival over time in individuals diagnosed with sarcoma at MCC, 1986-2014

|                                       | 1986-1994 aHR <sup>a</sup><br>(95% CI) | 1995-1999 aHR <sup>a</sup><br>(95% CI) | 2000-2005 aHR <sup>a</sup><br>(95% CI) | 2006-2010 aHR <sup>a</sup><br>(95% CI) | 2011-2014 aHR <sup>a</sup><br>(95% CI) |
|---------------------------------------|----------------------------------------|----------------------------------------|----------------------------------------|----------------------------------------|----------------------------------------|
|                                       | N=207                                  | N=208                                  | N=636                                  | N=795                                  | N=724                                  |
| <b>Sarcoma type</b>                   |                                        |                                        |                                        |                                        |                                        |
| Bone sarcoma                          | 1.00 (referent)                        | 0.96 (0.62-1.47)                       | 0.98 (0.69-1.38)                       | 0.94 (0.66-1.34)                       | 0.58* (0.35-0.94)                      |
| STS                                   | 1.00 (referent)                        | 0.69** (0.53-0.90)                     | 0.89 (0.72-1.10)                       | 0.80 (0.65-1.00)                       | 0.74* (0.58-0.95)                      |
| <b>Age at Diagnosis (yrs)</b>         |                                        |                                        |                                        |                                        |                                        |
| 15-39                                 | 1.00 (referent)                        | 0.96 (0.62-1.47)                       | 0.98 (0.69-1.38)                       | 0.94 (0.66-1.34)                       | 0.58* (0.35-0.94)                      |
| ≥ 40                                  | 1.00 (referent)                        | 0.69** (0.53-0.90)                     | 0.89 (0.72-1.10)                       | 0.80 (0.65-1.00)                       | 0.74* (0.58-0.95)                      |
| <b>Ethnicity</b>                      |                                        |                                        |                                        |                                        |                                        |
| Non-Hispanic                          | 1.00 (referent)                        | 0.76* (0.60-0.95)                      | 0.95 (0.79-1.15)                       | 0.83 (0.68-1.00)                       | 0.75* (0.60-0.94)                      |
| Hispanic                              | 1.00 (referent)                        | 1.01 (0.37-2.72)                       | 0.52 (0.23-1.20)                       | 0.83 (0.37-1.84)                       | 0.49 (0.20-1.21)                       |
| Unknown                               | 1.00 (referent)                        | NE                                     | NE                                     | 0.83 (0.15-4.53)                       | 0.63 (0.12-3.33)                       |
| <b>Tobacco use</b>                    |                                        |                                        |                                        |                                        |                                        |
| Never                                 | 1.00 (referent)                        | 0.67* (0.49-0.91)                      | 0.78 (0.61-1.00)                       | 0.76* (0.59-0.97)                      | 0.58*** (0.42-0.79)                    |
| Former user                           | 1.00 (referent)                        | 0.84 (0.51-1.40)                       | 0.91 (0.60-1.38)                       | 0.86 (0.56-1.32)                       | 0.85 (0.53-1.35)                       |
| Current                               | 1.00 (referent)                        | 1.02 (0.60-1.72)                       | 1.26 (0.82-1.92)                       | 0.99 (0.64-1.52)                       | 1.32 (0.78-2.23)                       |
| Unknown                               | 1.00 (referent)                        | 0.86 (0.43-1.73)                       | 1.55 (0.82-2.95)                       | 2.81* (1.12-7.06)                      | 0.75 (0.36-1.57)                       |
| <b>Stage</b>                          |                                        |                                        |                                        |                                        |                                        |
| Localized                             | 1.00 (referent)                        | 0.74* (0.55-1.00)                      | 0.89 (0.70-1.14)                       | 0.84 (0.65-1.08)                       | 0.77 (0.57-1.03)                       |
| Metastatic                            | 1.00 (referent)                        | 0.99 (0.69-1.40)                       | 1.11 (0.85-1.46)                       | 1.06 (0.81-1.40)                       | 0.85 (0.61-1.18)                       |
| Undefined                             | 1.00 (referent)                        | NE                                     | NE                                     | NE                                     | NE                                     |
| Unknown                               | 1.00 (referent)                        | 3.26 (0.20-52.14)                      | 0.68 (0.04-11.42)                      | NE                                     | 5.13 (0.26-100.10)                     |
| <b>First Treatment - Chemotherapy</b> |                                        |                                        |                                        |                                        |                                        |
| Yes                                   | 1.00 (referent)                        | 1.01 (0.71-1.45)                       | 1.14 (0.86-1.51)                       | 1.04 (0.78-1.39)                       | 1.07 (0.77-1.48)                       |
| No                                    | 1.00 (referent)                        | 0.67** (0.50-0.90)                     | 0.77* (0.61-0.98)                      | 0.73* (0.57-0.94)                      | 0.57*** (0.42-0.76)                    |
| <b>First Treatment - Surgery</b>      |                                        |                                        |                                        |                                        |                                        |
| Yes                                   | 1.00 (referent)                        | 0.70** (0.54-0.90)                     | 0.86 (0.70-1.06)                       | 0.85 (0.69-1.05)                       | 0.67** (0.52-0.86)                     |
| No                                    | 1.00 (referent)                        | 1.84* (1.11-3.05)                      | 1.84** (1.22-2.76)                     | 1.14 (0.75-1.74)                       | 1.22 (0.78-1.90)                       |

Abbreviations: aHR = adjusted hazard ratio; CI = confidence interval; NE = not estimated

<sup>a</sup> All characteristics were included in a single multivariable model to calculate aHR

\* p ≤ 0.05, \*\* p ≤ 0.01, \*\*\* p ≤ 0.001

Supplemental Table 4.

Histological subtypes on overall survival in individuals diagnosed with sarcoma at MCC by time period, 1986-2014

|                                       | 1986-1994 aHR <sup>a</sup><br>(95% CI) | 1995-1999 aHR <sup>a</sup><br>(95% CI) | 2000-2005 aHR <sup>a</sup><br>(95% CI) | 2006-2010 aHR <sup>a</sup><br>(95% CI) | 2011-2014 aHR <sup>a</sup><br>(95% CI) |
|---------------------------------------|----------------------------------------|----------------------------------------|----------------------------------------|----------------------------------------|----------------------------------------|
|                                       | N=207                                  | N=208                                  | N=636                                  | N=795                                  | N=724                                  |
| <b>Sarcoma subgroup</b>               |                                        |                                        |                                        |                                        |                                        |
| Osteosarcoma                          | 1.00 (referent)                        |
| Chondrosarcoma                        | 1.41 (0.63-3.19)                       | 1.41 (0.63-3.19)                       | 0.59 (0.22-1.56)                       | 0.48* (0.26-0.90)                      | 0.63 (0.36-1.10)                       |
| Ewing sarcoma                         | 2.31* (1.12-4.76)                      | 2.31* (1.12-4.76)                      | 0.86 (0.37-2.03)                       | 0.68 (0.39-1.21)                       | 0.80 (0.46-1.40)                       |
| Leiomyosarcoma                        | 2.09* (1.14-3.85)                      | 2.09* (1.14-3.85)                      | 1.49 (0.70-3.20)                       | 0.97 (0.62-1.52)                       | 0.78 (0.52-1.18)                       |
| Liposarcoma                           | 1.33 (0.69-2.56)                       | 1.33 (0.69-2.56)                       | 0.81 (0.35-1.84)                       | 0.87 (0.55-1.38)                       | 0.57* (0.36-0.90)                      |
| Gastrointestinal stromal tumor        | NE                                     | 0.78 (0.16-3.76)                       | 0.53** (0.33-0.83)                     | 0.22**** (0.13-0.37)                   | 0.21** (0.08-0.54)                     |
| Spindle cell sarcoma/NOS              | 2.34* (1.22-4.48)                      | 2.34* (1.22-4.48)                      | 2.11 (0.92-4.87)                       | 1.50 (0.94-2.40)                       | 1.05 (0.68-1.64)                       |
| Synovial sarcoma                      | 1.28 (0.61-2.66)                       | 1.16 (0.44-3.01)                       | 0.96 (0.56-1.65)                       | 0.68 (0.39-1.20)                       | 0.61 (0.19-1.93)                       |
| Rhabdomyosarcoma                      | 1.72 (0.73-4.02)                       | 2.96 (0.34-25.63)                      | 0.42 (0.17-1.03)                       | 0.76 (0.36-1.59)                       | 1.97 (0.63-6.23)                       |
| Endometrial stromal sarcoma           | 1.14 (0.33-4.02)                       | 1.18 (0.35-4.04)                       | 0.26** (0.12-0.59)                     | 0.44* (0.23-0.86)                      | 0.45 (0.11-1.86)                       |
| Other                                 | 1.47 (0.57-3.77)                       | 1.74 (0.54-5.63)                       | 1.88* (1.14-3.11)                      | 1.15 (0.67-1.96)                       | 1.13 (0.38-3.38)                       |
| <b>Age at Diagnosis (yrs)</b>         |                                        |                                        |                                        |                                        |                                        |
| 15-39                                 | 1.00 (referent)                        |
| ≥ 40                                  | 2.14** (1.35-3.38)                     | 1.86* (1.09-3.19)                      | 1.47** (1.12-1.92)                     | 1.66*** (1.24-2.22)                    | 2.34*** (1.44-3.81)                    |
| <b>Tobacco use</b>                    |                                        |                                        |                                        |                                        |                                        |
| Never                                 | 1.00 (referent)                        |
| Former user                           | 0.76 (0.48-1.20)                       | 1.31 (0.85-2.03)                       | 1.23 (0.97-1.55)                       | 1.07 (0.84-1.36)                       | 1.38 (0.97-1.96)                       |
| Current                               | 0.89 (0.57-1.39)                       | 1.05 (0.64-1.72)                       | 1.34* (1.01-1.76)                      | 1.17 (0.88-1.57)                       | 1.70* (1.07-2.72)                      |
| Unknown                               | 0.76 (0.43-1.35)                       | 0.87 (0.49-1.55)                       | 1.31 (0.85-2.01)                       | 2.42* (1.12-5.24)                      | 1.00 (0.54-1.82)                       |
| <b>Spread</b>                         |                                        |                                        |                                        |                                        |                                        |
| Localized                             | 1.00 (referent)                        |
| Metastatic                            | 2.33**** (1.64-3.31)                   | 1.95** (1.28-2.98)                     | 2.78**** (2.20-3.50)                   | 2.33**** (1.86-2.91)                   | 2.10**** (1.45-3.03)                   |
| Undefined                             | NE                                     | NE                                     | 2.25 (0.64-7.89)                       | 2.50 (0.34-18.52)                      | 3.65 (0.83-15.96)                      |
| Unknown                               | 0.44 (0.06-3.37)                       | 1.85 (0.63-5.41)                       | 0.75 (0.10-5.80)                       | NE                                     | 1.72 (0.50-5.91)                       |
| <b>First Treatment - Chemotherapy</b> |                                        |                                        |                                        |                                        |                                        |
| Yes                                   | 1.00 (referent)                        |
| No                                    | 0.96 (0.66-1.39)                       | 0.73 (0.48-1.10)                       | 0.73** (0.58-0.91)                     | 0.58**** (0.46-0.74)                   | 0.56** (0.38-0.82)                     |
| <b>First Treatment - Surgery</b>      |                                        |                                        |                                        |                                        |                                        |
| Yes                                   | 1.00 (referent)                        |
| No                                    | 1.37 (0.87-2.13)                       | 5.01**** (3.01-8.36)                   | 2.94**** (2.24-3.86)                   | 1.87**** (1.40-2.51)                   | 2.58**** (1.76-3.79)                   |

Abbreviations: aHR = adjusted hazard ratio; CI = confidence interval; NE = not estimated

<sup>a</sup> All characteristics were included in a single multivariable model to calculate aHR

\* p ≤ 0.05, \*\* p ≤ 0.01, \*\*\* p ≤ 0.001, \*\*\*\* p ≤ 0.0001
